# Supplementary figures and images for: Integrin α3β1 Represses Reelin Expression in Breast Cancer Cells to Promote Invasion
Source: MDPI journal article supplement (doi:10.3390/cancers13020344), 2021-01-19

## Figure S4: Uncropped western blotting figures

Figure S1A

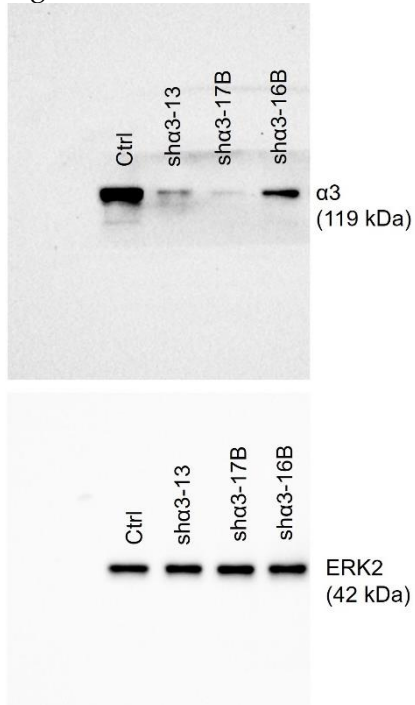

Figure 3A

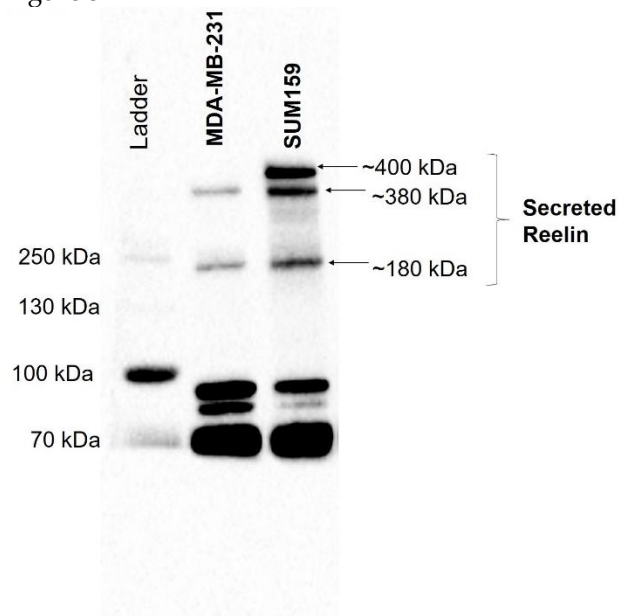

Figure 6A

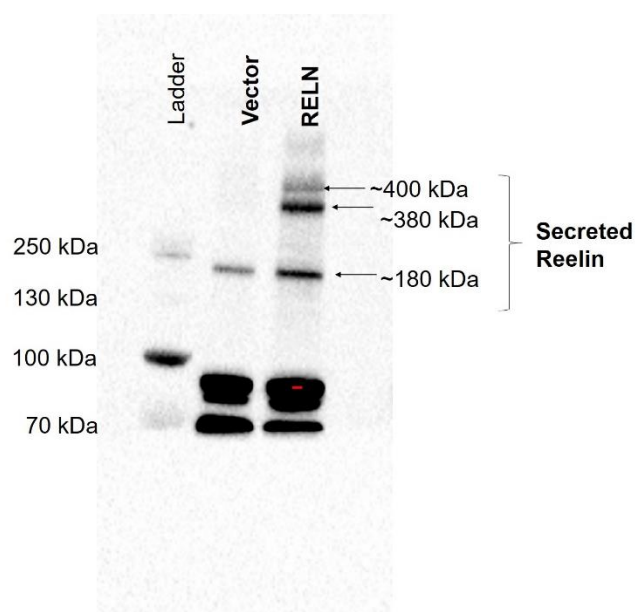

Supplement: s1 [file s1]
